# Supplementary material for: A high resolution Fourier transform ion trap enabled by image current splicing: a theoretical study
Source: Royal Society of Chemistry journal article supplement (doi:10.1039/d2ay02034c), 2023-01-01
Supplement: d2ay02034c1.pdf [file d2ay02034c1.pdf]

# High Resolution Fourier Transform Ion Trap Enabled by Image Current Splicing: A Theoretical Study

## Electronic noise of amplifier

The electronic noise of amplifier includes voltage noise, current noise and thermal noise. OPA 657 was used in the proposed method<sup>1</sup>. The electrical characteristics<sup>2</sup> of OPA 657 related to electronic noise were listed in Table S1.

**Table S1** The electrical characteristics of OPA 657 related to electronic noise

| Symbol     | Parameter                      | Condition                               | Min | Typ            | Max | Units                        |
|------------|--------------------------------|-----------------------------------------|-----|----------------|-----|------------------------------|
| GBW        | Gain-bandwidth product         | $G > +40$ V/V, $T = 25^{\circ}\text{C}$ |     | 1600           |     | MHz                          |
|            | Input impedance (differential) | $T = 25^{\circ}\text{C}$                |     | $10^{12}  0.7$ |     | $\Omega  \text{pF}$          |
|            | Input impedance (common-mode)  | $T = 25^{\circ}\text{C}$                |     | $10^{12}  4.5$ |     | $\Omega  \text{pF}$          |
| $e_n$      | Input voltage noise density    | $f > 100$ kHz, $T = 25^{\circ}\text{C}$ |     | 4.8            |     | $\text{nV}/\sqrt{\text{Hz}}$ |
| $e_{n\_L}$ | Input voltage noise density    | $f = 10$ Hz, $T = 25^{\circ}\text{C}$   |     | 38             |     | $\text{nV}/\sqrt{\text{Hz}}$ |
| $i_n$      | Input current noise density    | $f > 100$ kHz, $T = 25^{\circ}\text{C}$ |     | 1.3            |     | $\text{fA}/\sqrt{\text{Hz}}$ |

The input capacitance of OPA 657 lumped in with differential and common-mode input is

$$C_{opa} = 0.7\text{pF} + 4.5\text{pF} = 5.2\text{pF}. \quad \backslash * \text{ MERGEFORMAT (1)}$$

The feedback resistance  $R_f$  and feedback capacitor  $C_f$  are 75 M $\Omega$  and 25 fF, respectively. Thus, the zero  $f_z$  and pole  $f_{p3,4}$  contained in the transfer function are

$$f_z = \frac{1}{2\pi R_f (C_f + C_{opa})} = 406.1\text{Hz} \quad \backslash * \text{ MERGEFORMAT (2)}$$

$$f_p = \frac{1}{2\pi R_f C_f} = 84.9\text{KHz}. \quad \backslash * \text{ MERGEFORMAT (3)}$$

Intersection of the voltage noise gain curve with the AOL curve  $f_{i1}$  is

$$f_i = \frac{C_f}{C_{opa} + C_f} GBW = 7.7\text{MHz}. \quad \backslash * \text{ MERGEFORMAT (4)}$$

The start frequency of 1/f noise  $f_L$  is 10 Hz obtained in the data sheet, and the 1/f noise voltage corner frequency  $f_{f1}$  is

$$f_f = \frac{e_n^2 f_L}{e_n^2} = 626.7 \text{Hz.} \quad \backslash * \text{MERGEFORMAT (5)}$$

The voltage noise in region 1 (between  $f_L$  and  $f_f$ ) is

$$E_{noe1} = e_n \sqrt{f_f \ln \left( \frac{f_f}{f_L} \right)} = 244.4 \text{nV.} \quad \backslash * \text{MERGEFORMAT (6)}$$

The voltage noise in region 2 (between  $f_z$  and  $f_p$ ) is

$$E_{noe2} = \frac{e_n}{f_z} \sqrt{\frac{f_p^3 - f_z^3}{3}} = 168.8 \mu\text{V.} \quad \backslash * \text{MERGEFORMAT (7)}$$

The voltage noise in region 3 (between  $f_p$  and  $f_i$ ) is

$$E_{noe3} = e_n \frac{C_{opa} + C_f}{C_f} \sqrt{f_i - f_p} = 2.8 \text{mV.} \quad \backslash * \text{MERGEFORMAT (8)}$$

The voltage noise in region 4 (greater than  $f_i$ ) is

$$E_{noe4} = e_n G W B \sqrt{\frac{1}{f_i}} = 2.8 \text{mV.} \quad \backslash * \text{MERGEFORMAT (9)}$$

The voltage noise is

$$E_{noe} = \sqrt{E_{noe1}^2 + E_{noe2}^2 + E_{noe3}^2 + E_{noe4}^2} = 3.9 \text{mV.} \quad \backslash * \text{MERGEFORMAT (10)}$$

The voltage noise in region 1 and 2 is partially overlapped, which is ignored because the voltage noise in region 1 is much smaller than that in region 2. The current voltage<sup>1</sup> is

$$E_{noi} = i_n R_f \sqrt{K_n f_p} = 35.6 \mu\text{V} \quad \backslash * \text{MERGEFORMAT (11)}$$

where  $K_n = 1.57$  is the brick wall conversion factor for 1 filter order. The thermal noise<sup>5</sup> is

$$E_{nor} = \sqrt{4kTR_f K_n f_p} = 400.5 \mu\text{V} \quad \backslash * \text{MERGEFORMAT (12)}$$

where  $k = 1.38 \times 10^{-23} \text{J/K}$  is Boltzmann's constant and  $T = 298 \text{K}$  is temperature in Kelvin.

The total noise is

$$E_{no} = \sqrt{E_{noe}^2 + E_{noi}^2 + E_{nor}^2} = 3.9 \text{mV.} \quad \backslash * \text{MERGEFORMAT (13)}$$

## Validation using FT-ICR data

Figure S1a plotted the raw signal in time domain which was the image current induced by cytochrome C (16+) ions at  $1 \times 10^{-10}$  Torr with nitrogen as the buffer gas. Compared with Figure S1b, the signal decay in Figure 1 was not apparent. Figure S2b showed the raw signal with only the 186-187 kHz frequency band retained, which is the signal shown in Figure 1 filtered by a bandpass filter with a passband of 186-187 kHz. The signal in Figure S2b was exponentially decaying.

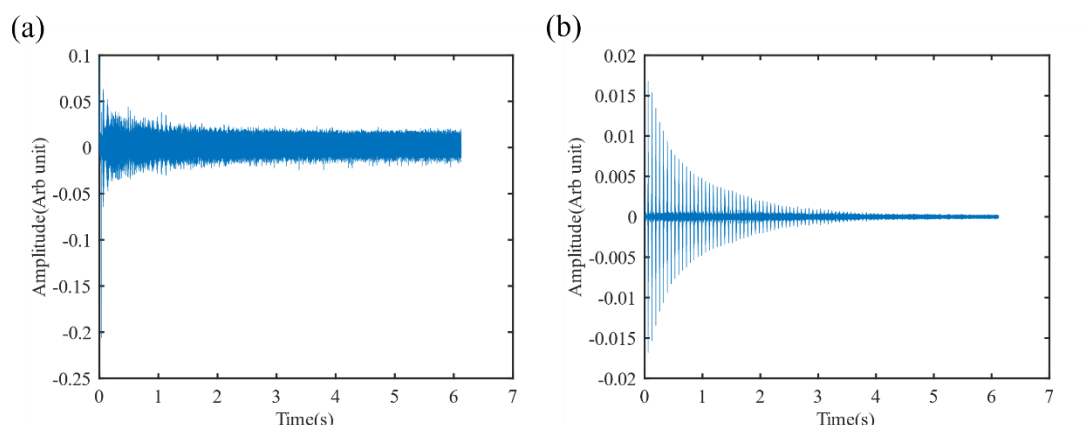

**Figure S1 (a).** The raw signal in time domain which was the image current induced by cytochrome C (16+) ions at  $1 \times 10^{-10}$  Torr with nitrogen as the buffer gas. **(b).** The raw signal filtered by a bandpass filter with passband of 186-187 kHz.

Due to the previous process such as envelope normalization and the splicing, the reconstructed signal didn't decay, which resulted in a poor overlap between the frequency spectrum of the reconstructed signal and these 3 sets of raw signals. When the reconstructed signal was decayed as the raw signals, the correlation coefficients between the reconstructed spectrum and 3 sets of raw spectra were increased to 0.98-0.99, which meant that they were about the same. Figure S2 was the frequency spectra of the reconstructed signal with the same decay ratio and these 3 sets of raw signals.

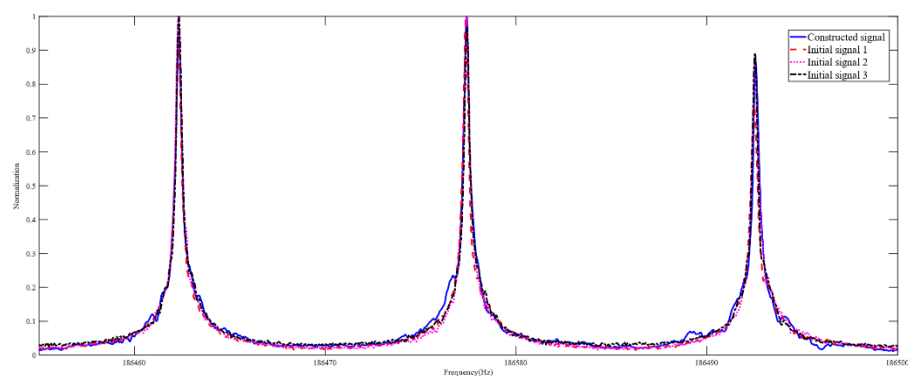

**Figure S2.** The frequency spectra of the reconstructed signals with decay and these 3 sets of raw signals.

## References:

1. K. Art, *Operational Amplifier Noise*, 2012.
2. J. M. Bryant, *Electron Eng*, 1996, **68**, 47-&.
3. A. V. Kretinin and Y. Chung, *Rev Sci Instrum*, 2012, **83**.
4. A. J. Peyton, Y. Aboufakher and B. Wilson, *Iee P-Circ Dev Syst*, 1994, **141**, 210-214.
5. F. N. Trofimenkoff and O. A. Onwuachi, *Ieee T Educ*, 1989, **32**, 12-17.
